# Supplementary material for: Body Fat Percentage and Availability of Oral Food Intake: Prognostic Factors and Implications for Nutrition in Amyotrophic Lateral Sclerosis
Source: MDPI journal article supplement (doi:10.3390/nu13113704), 2021-10-21
Supplement: s1 [file s1]

**Table S1.** Demographics of ALS patients.

| <b>Variables</b>                                                     | <b><i>n</i></b> | <b>Mean <math>\pm</math> SD</b> | <b>Median</b> |
|----------------------------------------------------------------------|-----------------|---------------------------------|---------------|
| Gender (M: F)                                                        | 52 (31:22)      |                                 |               |
| Age at symptom onset                                                 | 52              | 61.25 $\pm$ 10.24               | 62            |
| Age at initial BIA measurement                                       | 52              | 65.04 $\pm$ 8.42                | 65            |
| $\Delta$ Weight (g)/duration (month)                                 | 52              | 18.02 $\pm$ 946.45              | 0             |
| $\Delta$ Muscle mass (g)/duration (months)                           | 52              | 328.65 $\pm$ 1673.16            | -44.93        |
| $\Delta$ Body mass index (BMI, kg/m <sup>2</sup> )/duration (months) | 52              | 0.01 $\pm$ 0.33                 | 0             |
| $\Delta$ Skeletal muscle mass (g)/duration (months)                  | 52              | 136.13 $\pm$ 880.04             | -38.26        |
| $\Delta$ Fat-free muscle mass (g)/duration (months)                  | 52              | 309.32 $\pm$ 1599.87            | -44.51        |
| $\Delta$ SMI (kg/m <sup>2</sup> )/duration (months)                  | 52              | 0.1 $\pm$ 0.61                  | -0.03         |
| $\Delta$ Body fat percentage (%)/duration (months)                   | 52              | -0.77 $\pm$ 4.66                | 0.1           |
| $\Delta$ Phase angle (degree)/duration (months)                      | 52              | -0.16 $\pm$ 0.31                | -0.09         |
| $\Delta$ ECW/TBW (mL)/duration (months)                              | 52              | 2.19 $\pm$ 4.87                 | 1.09          |
| $\Delta$ Basal metabolism (kcal)/duration (months)                   | 52              | 6.73 $\pm$ 34.73                | -0.89         |
| Duration between measurement (months)                                | 52              | 7.46 $\pm$ 5.08                 | 6.17          |
| Number of patients with tracheostomy                                 | 25              |                                 |               |
| Number of patients with possible oral food intake                    | 11              |                                 |               |
| Number of patients with PEG                                          | 15              |                                 |               |
| Number of patients with a nasogastric tube                           | 25              |                                 |               |

$\Delta$  = subtraction from follow-up measurements to baseline BIA values. SD = standard deviation.
